# Supplementary material for: Facilitative-Competitive Interactions in an Old-Growth Forest: The Importance of Large-Diameter Trees as Benefactors and Stimulators for Forest Community Assembly
Source: PLOS journal article supplement (doi:10.1371/journal.pone.0120335), 2015-03-24

**S2 Fig. Semivariogram of the standardised residuals obtained by the best-fitting GLS model.**

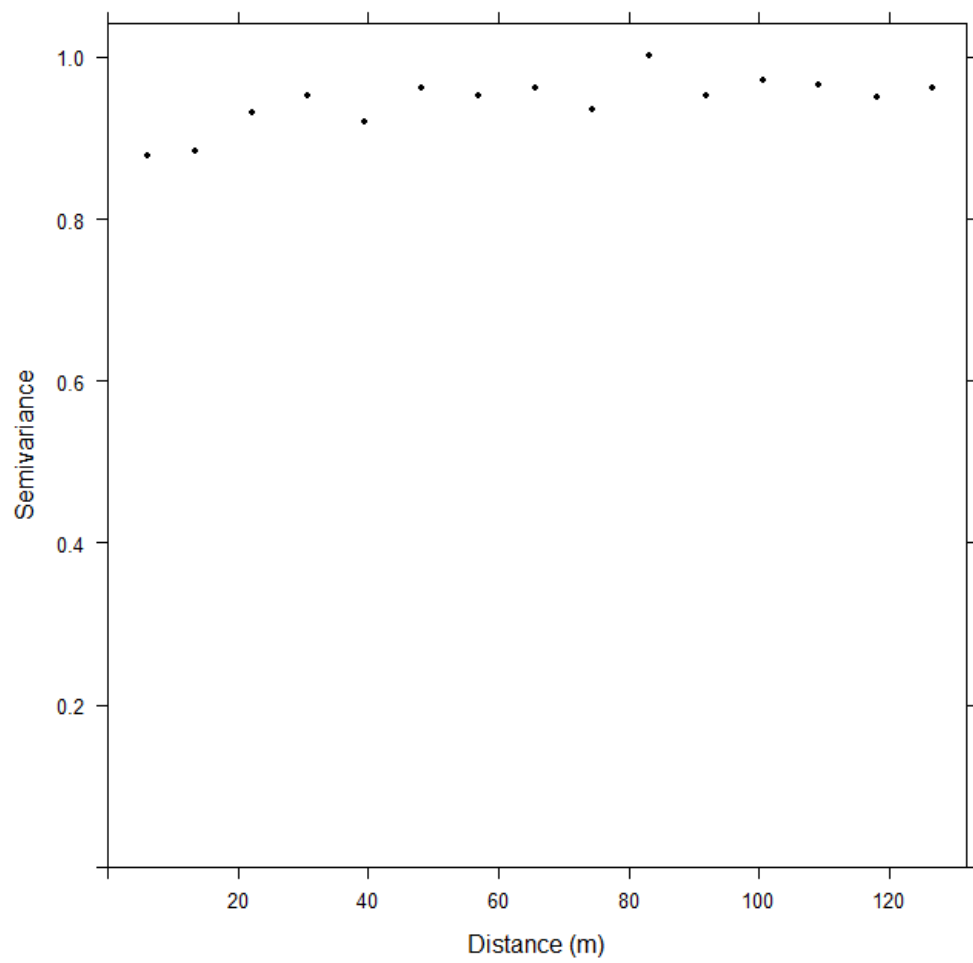

Supplement: S2 (10.1371/journal.pone.0120335.s002) [file journal.pone.0120335.s002]
